# Supplementary material for: Improvement of durability of an organic photocatalyst in p-xylene oxygenation by addition of a Cu(ii) complex
Source: Royal Society of Chemistry journal article supplement (doi:10.1039/c2cp41207a), 2012-01-01

## Electronic Supporting Information

for

### Improvement of durability of an organic photocatalyst in selective oxygenation of *p*-xylene by addition of a Cu(II) complex

Yusuke Yamada,<sup>a</sup> Kazuki Maeda,<sup>a</sup> Kei Ohkubo<sup>a</sup>, Kenneth D. Karlin<sup>\*b,c</sup> and Shunichi Fukuzumi<sup>\*a,c</sup>

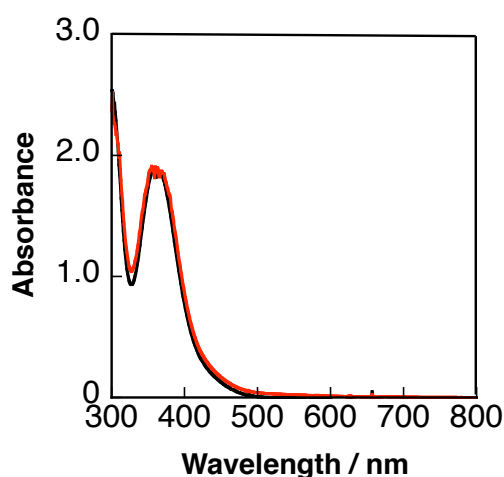

**Fig. S1** UV-vis spectra of an NaI-saturated acetonitrile solution (2.0 mL) to which an acetonitrile solution containing 7.6 mM H<sub>2</sub>O<sub>2</sub> (20 μL, black) or an acetonitrile solution containing 1.0 mM [(tmpa)Cu<sup>II</sup>]<sup>2+</sup> and 7.6 mM H<sub>2</sub>O<sub>2</sub> (20 μL, red) was added. The absorption band appeared at 361 nm is ascribed to formation of I<sub>3</sub><sup>−</sup> ( $\varepsilon = 2.5 \times 10^4 \text{ M}^{-1} \text{ cm}^{-1}$ ) by following reactions.

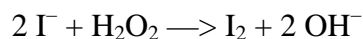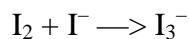

Supplement: c2cp41207a.pdf [file c2cp41207a.pdf]
